# Supplementary material for: An endoplasmic reticulum stress-related signature featuring ASNS for predicting prognosis and immune landscape in prostate cancer
Source: publisher site journal article supplement (doi:10.18632/aging.205280), 2024-01-10
Supplement: Supplementary file [file aging-v16i1-205280-supplementary-material-SD1.pdf]

SUPPLEMENTARY FIGURES

NMF rank survey

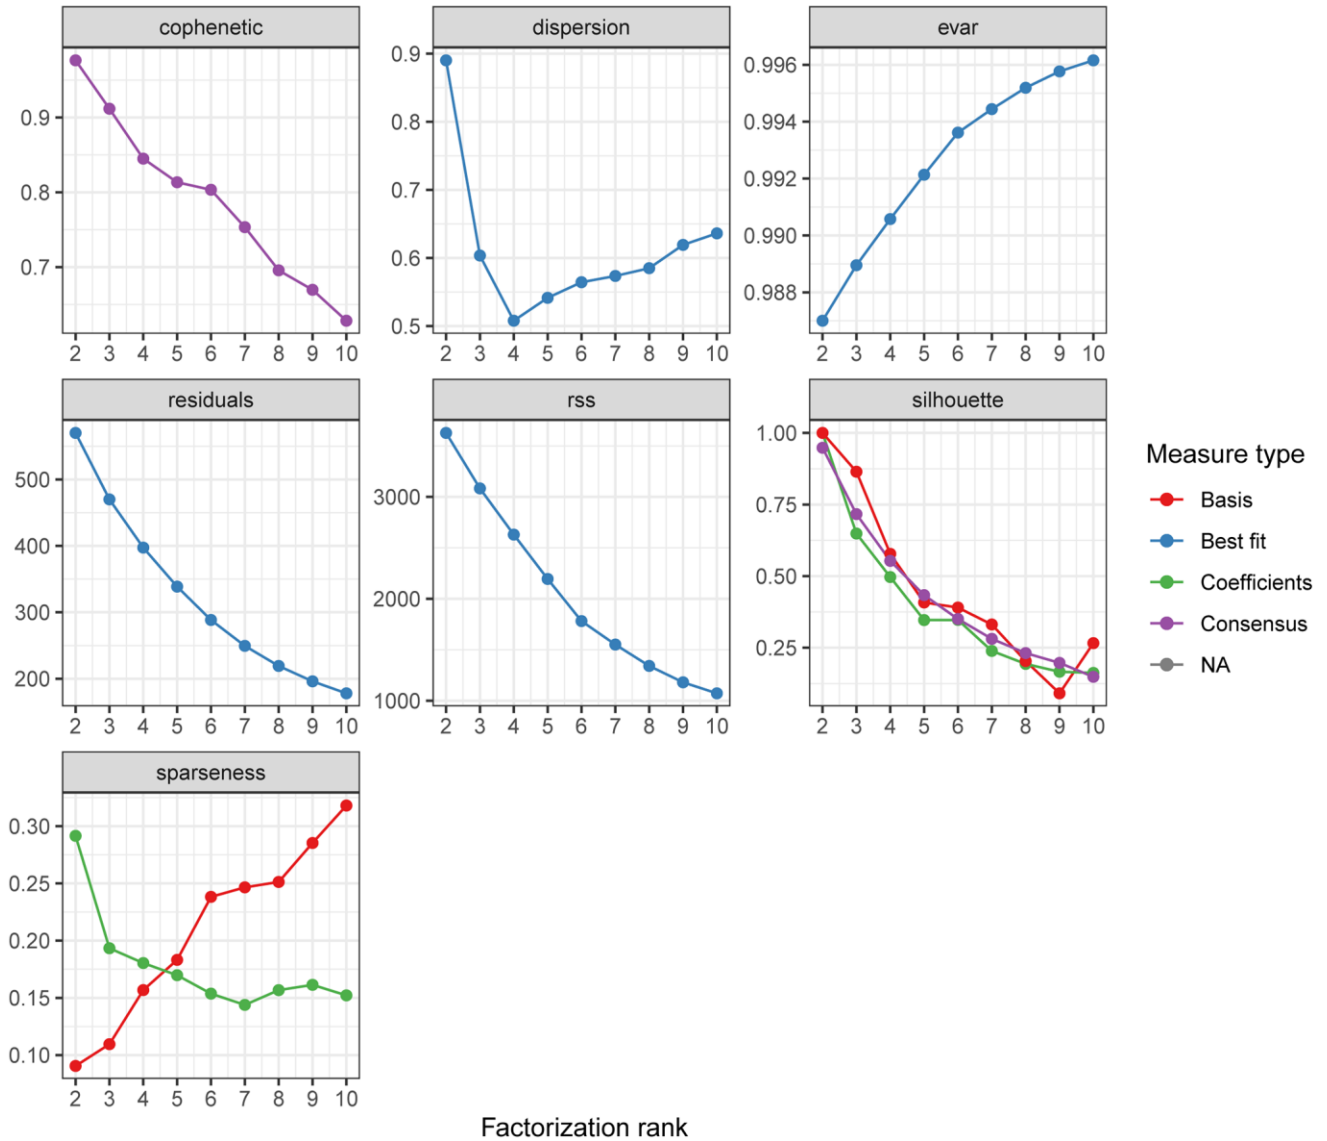

Supplementary Figure 1. The plots of cophenetic correlation coefficient reflected the stability of the cluster generated from NMF.

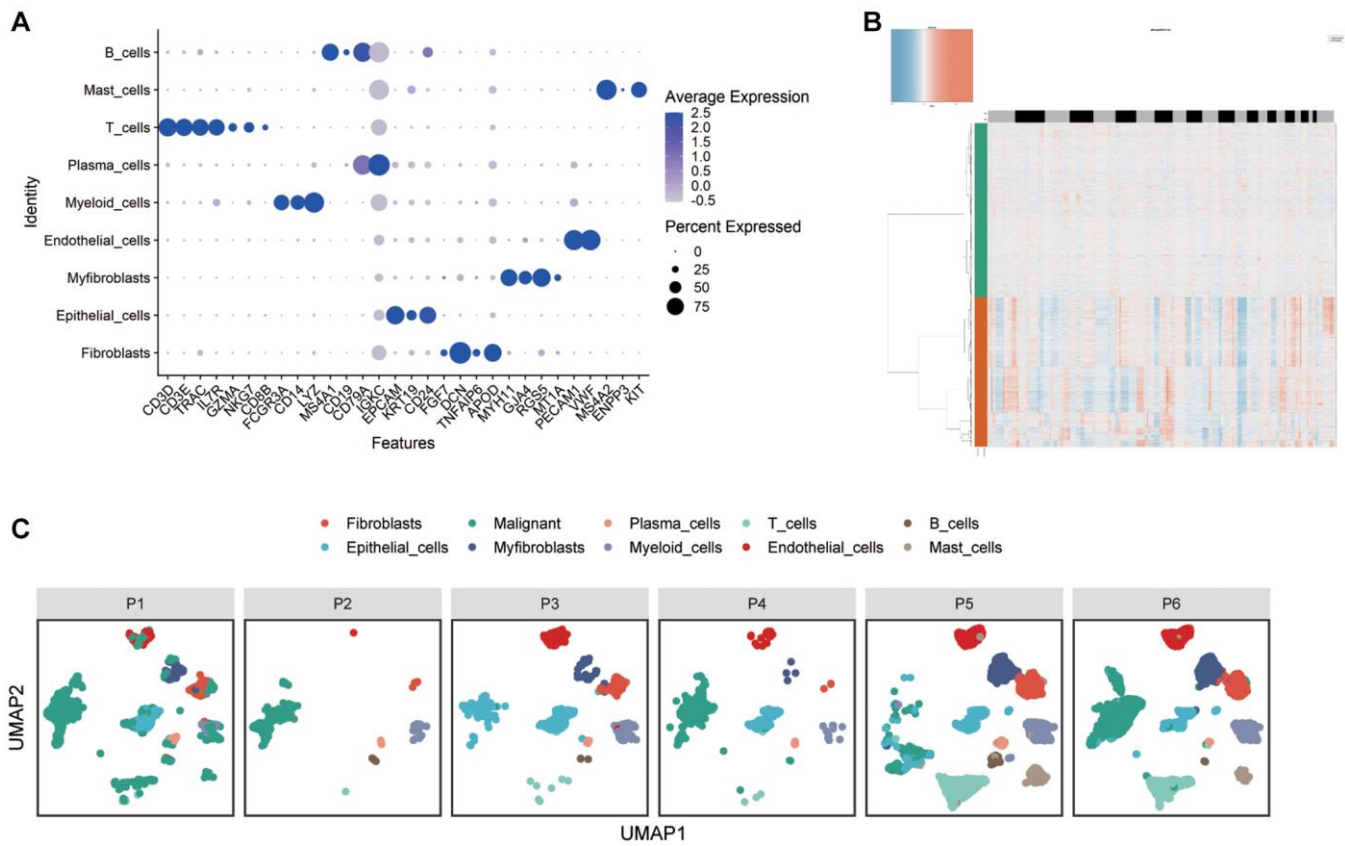

**Supplementary Figure 2. Sample preprocessing of the scRNA-seq.** (A) Markers of the main clusters. (B) The “copykat” R package was utilized to identify malignant cells. (C) UMAP plot revealed the composition of 10 main clusters from 6 patients.

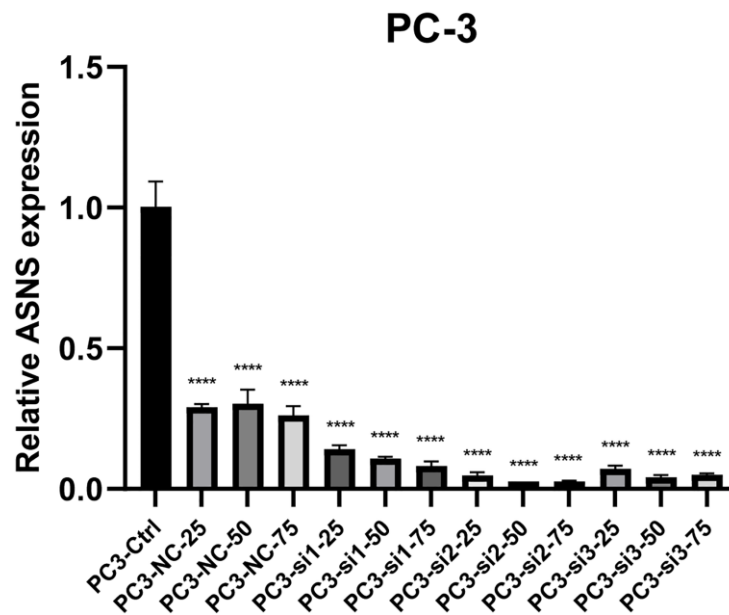

**Supplementary Figure 3. Relative RNA expression for knockdown of ASNS.** \*\*\*\* $p < 0.0001$ .
