# Supplementary material for: An endoplasmic reticulum stress-related signature featuring ASNS for predicting prognosis and immune landscape in prostate cancer
Source: publisher site journal article supplement (doi:10.18632/aging.205280), 2024-01-10
Supplement: Supplementary file [file aging-v16i1-205280-supplementary-material-SD2.pdf]

## SUPPLEMENTARY TABLE

Supplementary Table 1. Summary of ERS-related genes.

| ERS-related gene |         |          |           |
|------------------|---------|----------|-----------|
| ACADVL           | DNAJB14 | MBTPS1   | SSR1      |
| ADD1             | DNAJB2  | MBTPS2   | STC2      |
| AGR2             | DNAJB9  | NCK1     | STT3B     |
| AIFM1            | DNAJC10 | NCK2     | STUB1     |
| ALOX15           | DNAJC18 | NFE2L1   | SULT1A3   |
| AMFR             | DNAJC3  | NFE2L2   | SVIP      |
| ANKS4B           | EDEM1   | NPLOC4   | SYVN1     |
| ANKZF1           | EDEM2   | NRBF2    | TARDBP    |
| APAF1            | EDEM3   | OPA1     | TATDN2    |
| ARFGAP1          | EEF2    | OS9      | TBL2      |
| ASNS             | EIF2AK2 | P4HB     | THBS1     |
| ATF3             | EIF2AK3 | PARK7    | THBS4     |
| ATF4             | EIF2AK4 | PARP16   | TLN1      |
| ATF6             | EIF2B5  | PDIA2    | TMBIM6    |
| ATF6B            | EIF2S1  | PDIA3    | TMCO1     |
| ATG10            | EP300   | PDIA4    | TMEM117   |
| ATP2A1           | ERLEC1  | PDIA5    | TMEM129   |
| ATP2A2           | ERLIN1  | PDIA6    | TMEM33    |
| ATP6V0D1         | ERLIN2  | PDX1     | TMEM67    |
| ATXN3            | ERN1    | PIK3R1   | TMTC3     |
| AUP1             | ERN2    | PIK3R2   | TMUB1     |
| BAK1             | ERP27   | PLA2G6   | TMUB2     |
| BAX              | ERP29   | PMAIP1   | TMX1      |
| BBC3             | ERP44   | PML      | TNFRSF10B |
| BCAP31           | EXTL1   | POMT2    | TOR1A     |
| BCL2             | EXTL2   | PPP1R15A | TP53      |
| BCL2L1           | EXTL3   | PPP1R15B | TPP1      |
| BCL2L11          | FAF2    | PPP2CB   | TRAF2     |
| BFAR             | FBXO2   | PPP2R5B  | TRIB3     |
| BHLHA15          | FBXO6   | PREB     | TRIM13    |
| BOK              | FCGR2B  | PSMC6    | TRIM25    |
| BRSK2            | FGF21   | PTPN1    | TSPYL2    |
| CALR             | FICD    | PTPN2    | TTC23L    |
| CASP4            | FKBP14  | RASGRF1  | TXNDC12   |
| CAV1             | FLOT1   | RASGRF2  | UBA5      |
| CCDC47           | FOXRED2 | RCN3     | UBAC2     |
| CCL2             | GET4    | RHBDD1   | UBE2G2    |
| CCND1            | GFPT1   | RNF103   | UBE2J1    |

|          |         |         |        |
|----------|---------|---------|--------|
| CDK5RAP3 | GORASP2 | RNF121  | UBE2J2 |
| CEBPB    | GOSR2   | RNF139  | UBE2K  |
| CFTR     | GRINA   | RNF175  | UBE4A  |
| CHAC1    | GSK3A   | RNF183  | UBE4B  |
| CLU      | GSK3B   | RNF185  | UBQLN1 |
| COPS5    | HDGF    | RNF186  | UBQLN2 |
| CREB3    | HERPUD1 | RNF5    | UBXN1  |
| CREB3L1  | HM13    | RNFT1   | UBXN4  |
| CREB3L2  | HSP90B1 | SCAMP5  | UBXN6  |
| CREB3L3  | HSPA13  | SDF2    | UBXN8  |
| CREB3L4  | HSPA1A  | SDF2L1  | UFC1   |
| CTDSP2   | HSPA5   | SEC16A  | UFM1   |
| CTH      | HYOU1   | SEC31A  | UGGT1  |
| CUL7     | IGFBP1  | SEC61B  | UGGT2  |
| CXXC1    | ITPR1   | SEL1L   | USP13  |
| DAB2IP   | JKAMP   | SERINC3 | USP14  |
| DCTN1    | JUN     | SERP1   | USP19  |
| DDIT3    | KDEL3   | SERP2   | USP25  |
| DDR3K1   | KLHDC3  | SESN2   | VAPB   |
| DDX11    | LMNA    | SGTA    | VCP    |
| DERL1    | LRRK2   | SGTB    | WFS1   |
| DERL2    | MAGEA3  | SHC1    | WIPI1  |
| DERL3    | MAN1B1  | SIRT1   | YIF1A  |
| DNAJB11  | MANF    | SRPRB   | YOD1   |
| DNAJB12  | MAP3K5  | SRPX    | ZBTB17 |

---
